# Supplementary material
Source: PubMed Central journal article supplement (PMC11019842)

Supp Fig 1

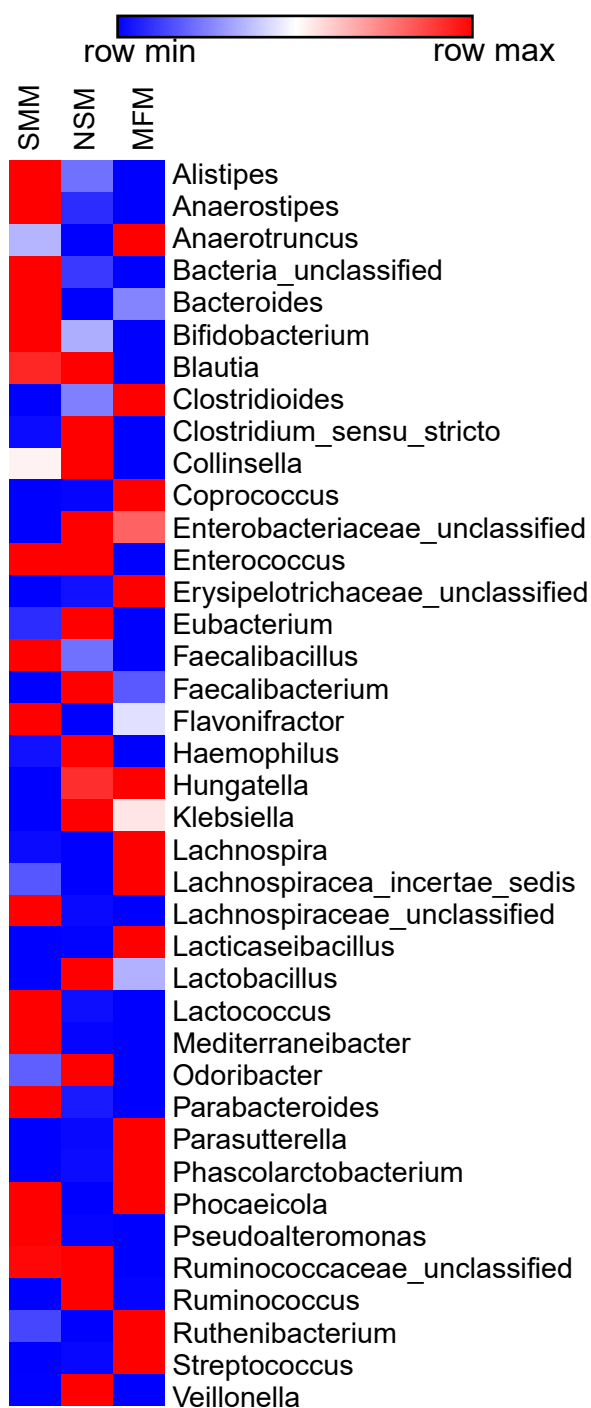

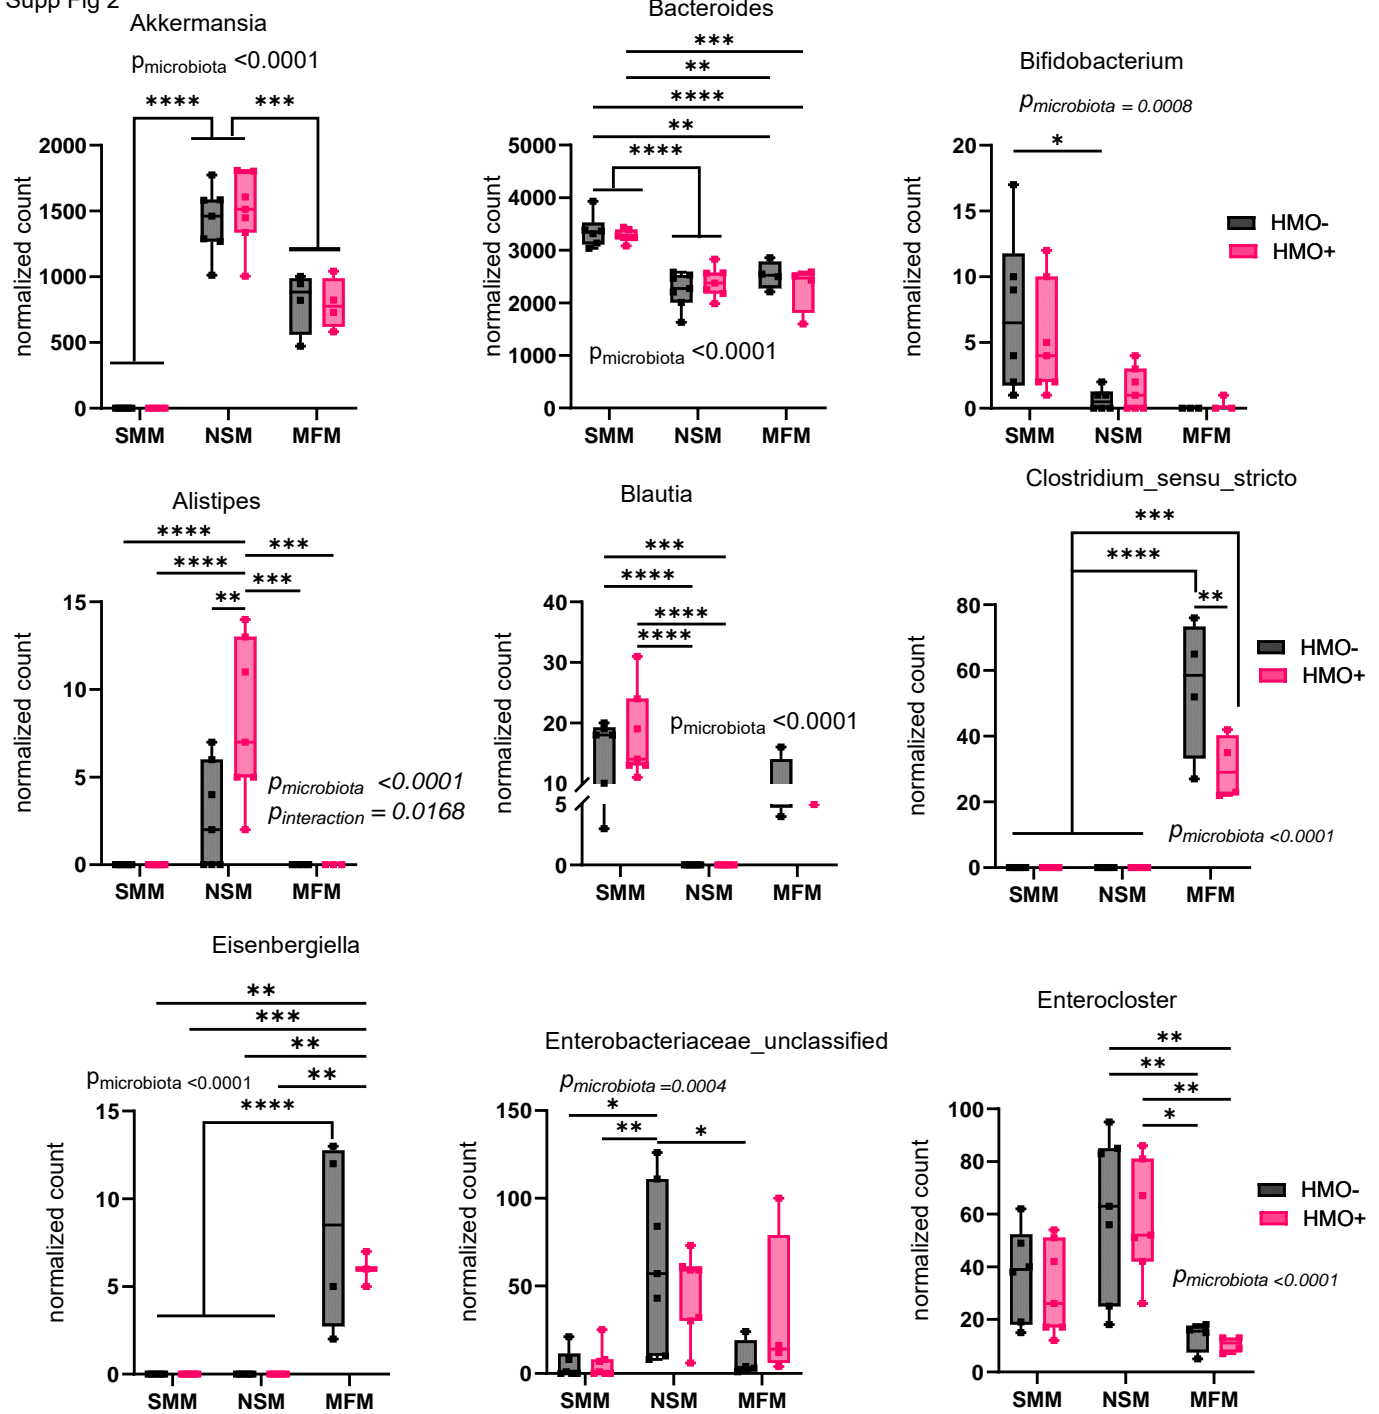

Erysipelatoclostridium

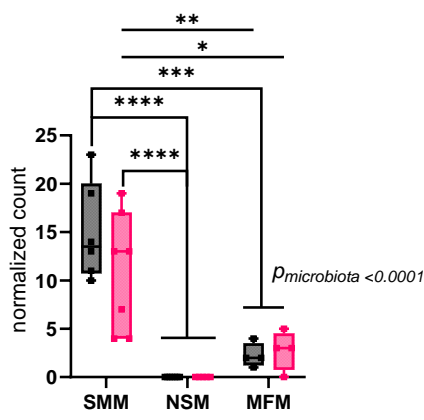

Extibacter

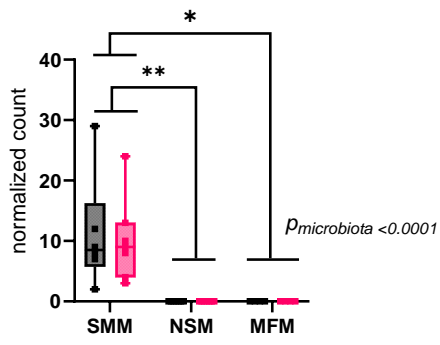

Klebsiella

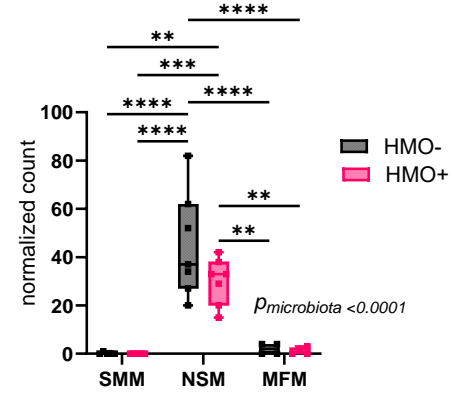

Lachnospiraceae\_incertae\_sedis

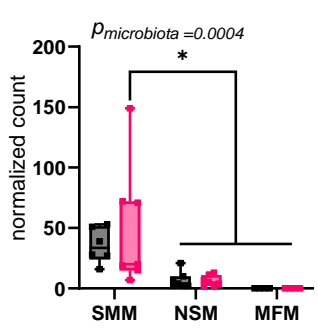

Lachnospiraceae\_unclassified

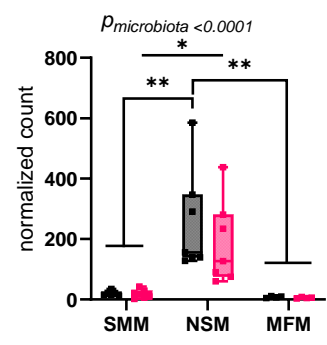

Parabacteroides

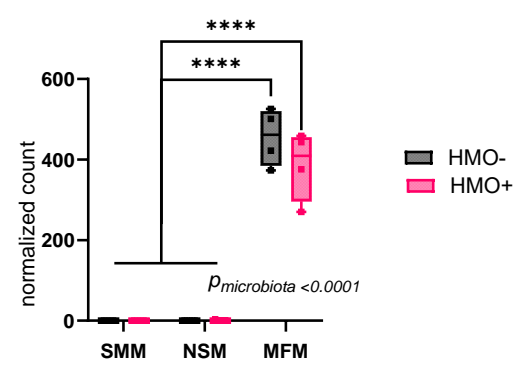

Parasutterella

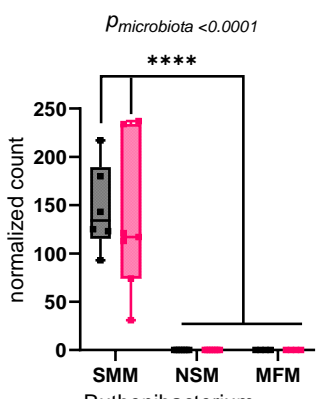

Parasutterella

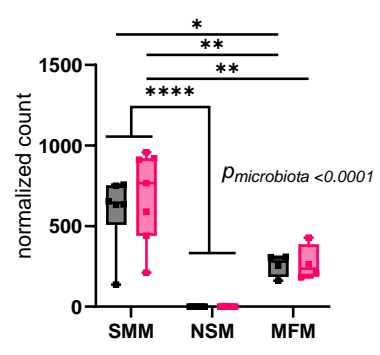

Ruminococcaceae\_unclassified

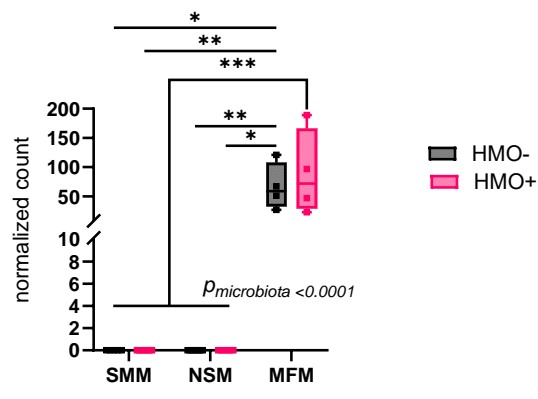

Ruthenibacterium

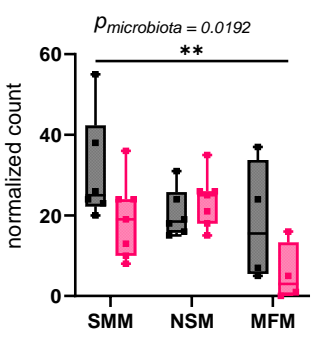

A

B cells

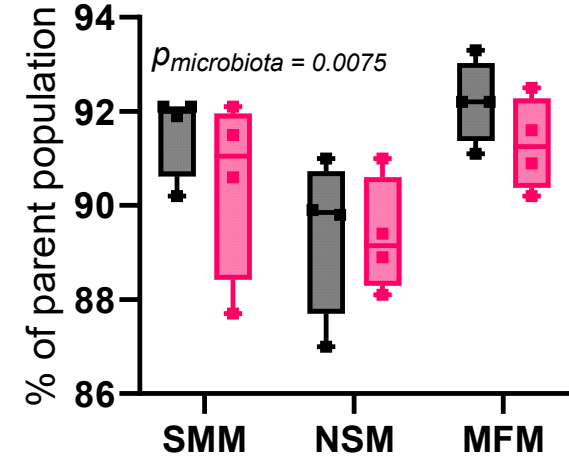

E

B cells

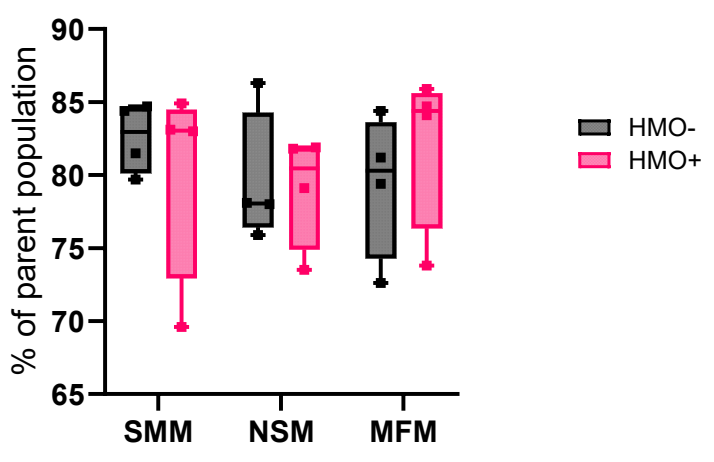

B

DCs

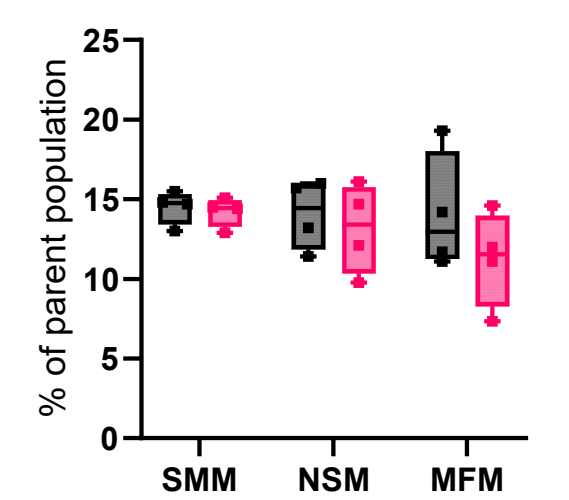

F

DCs

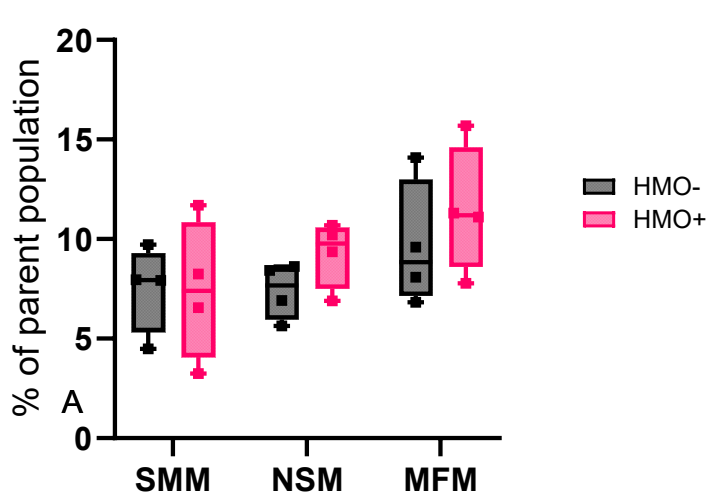

C

Monocytes

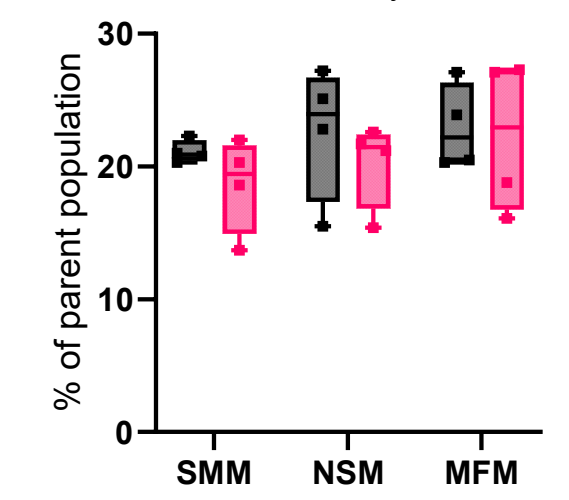

G

Monocytes

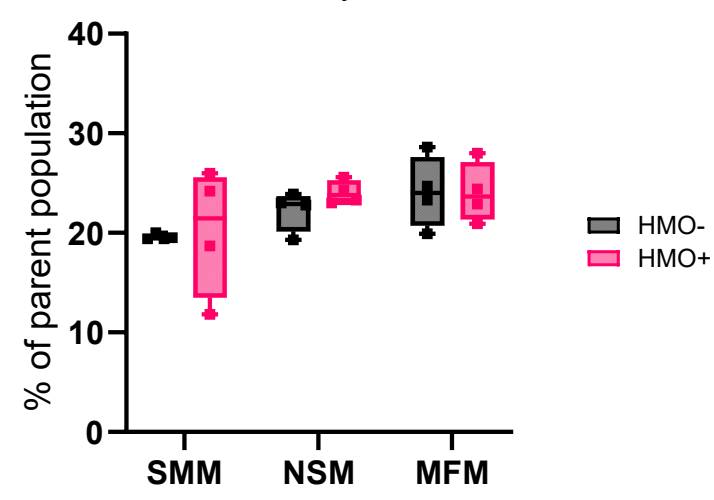

D

Neutrophils

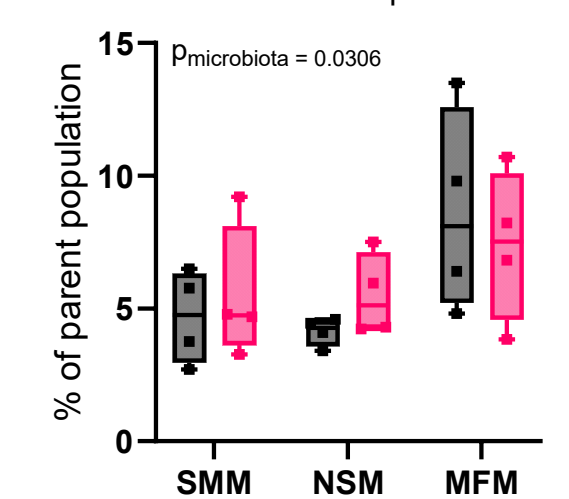

H

Neutrophils

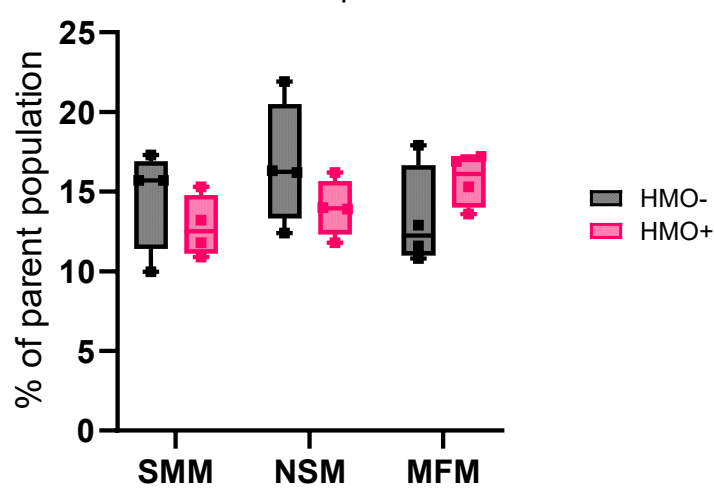

Supp Fig 5

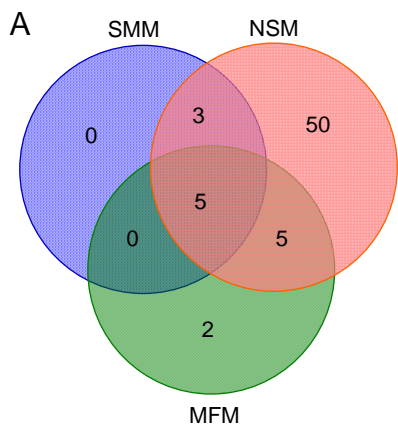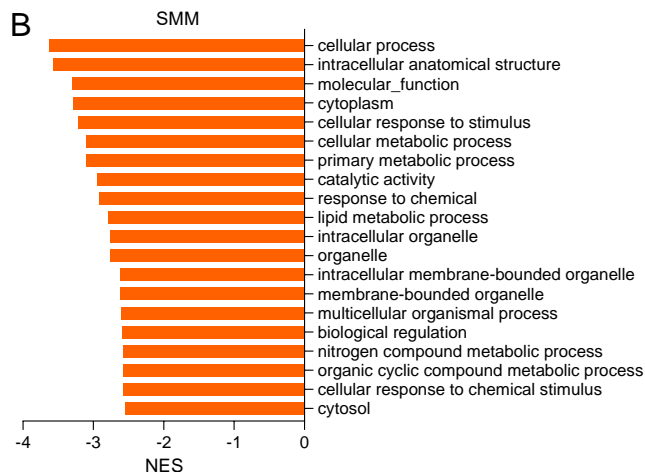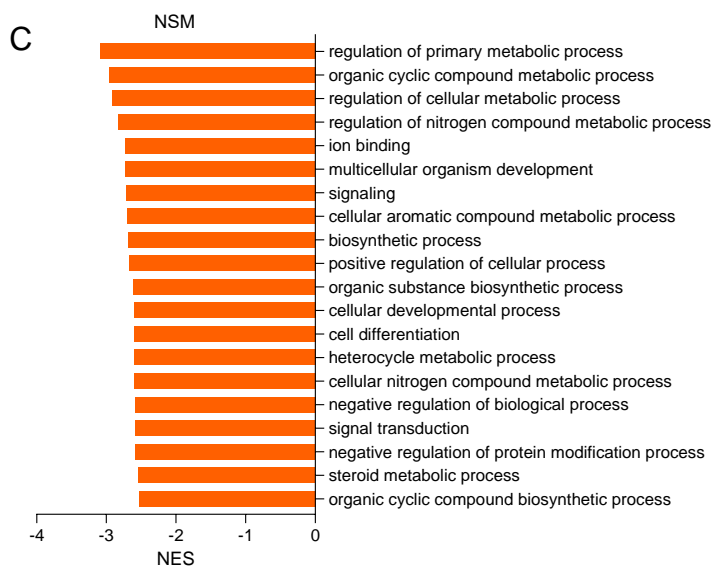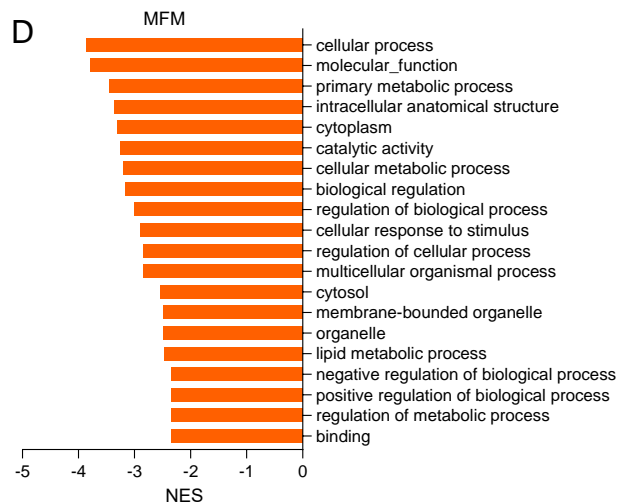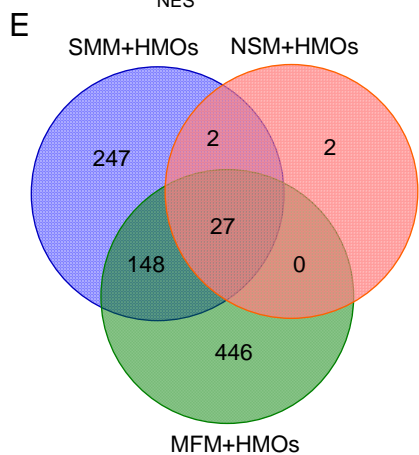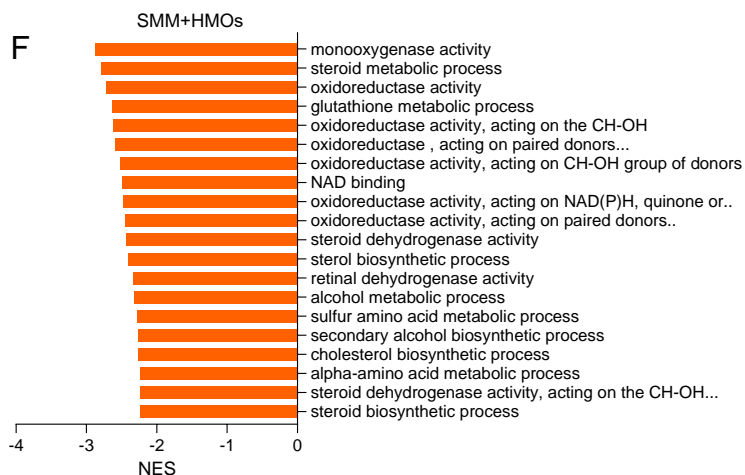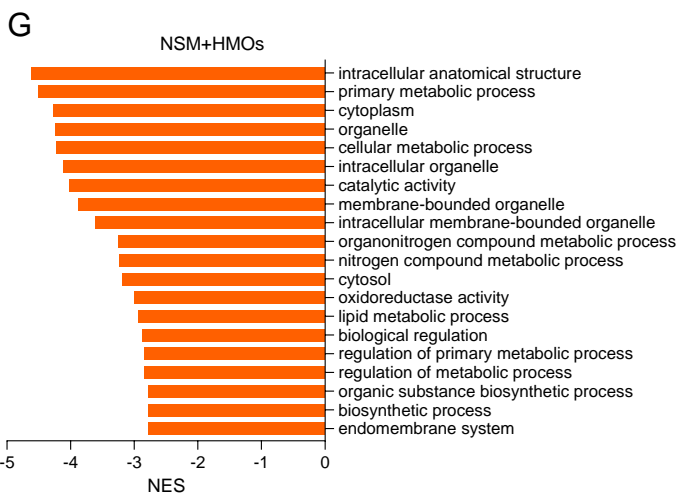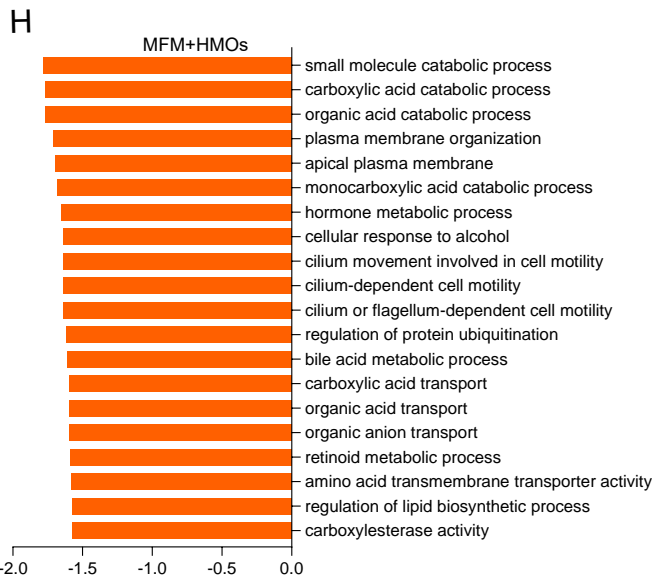

Supp Fig 6

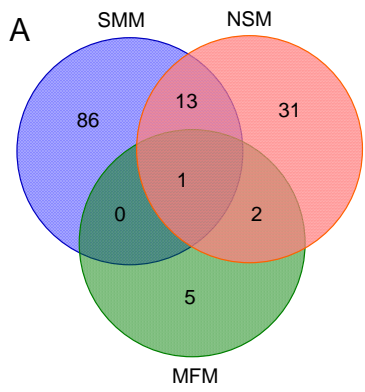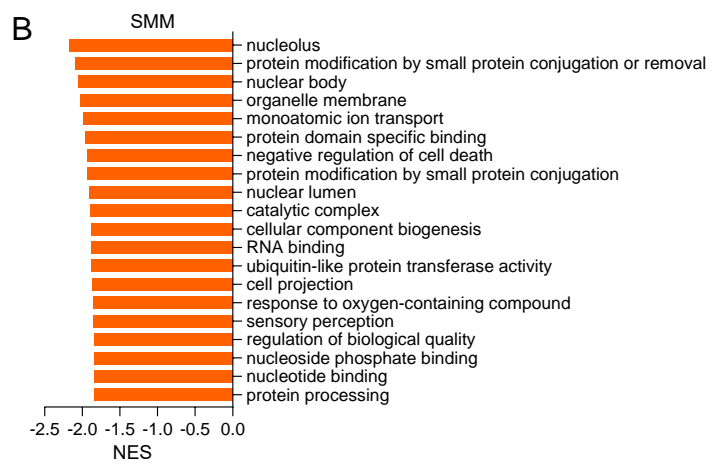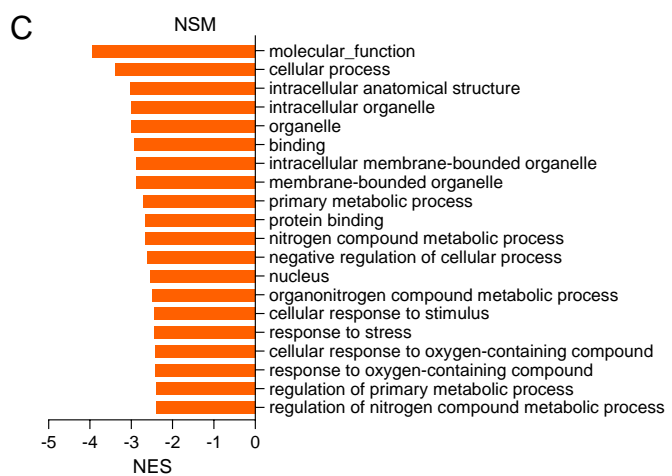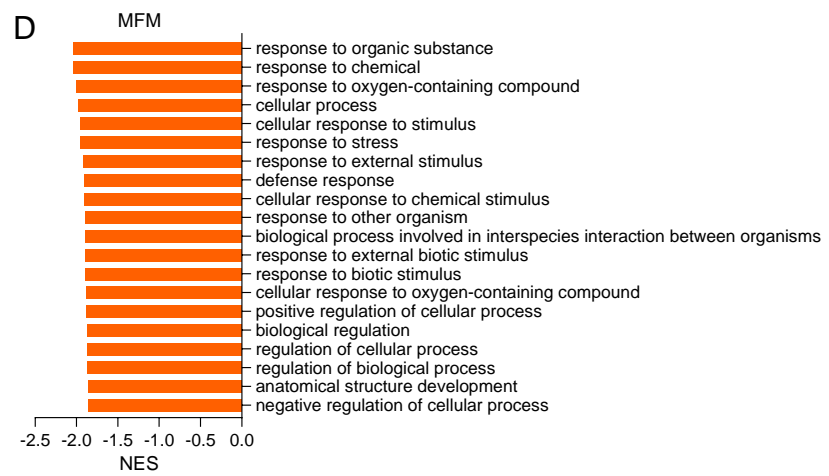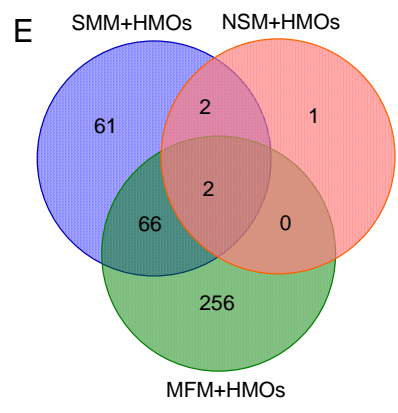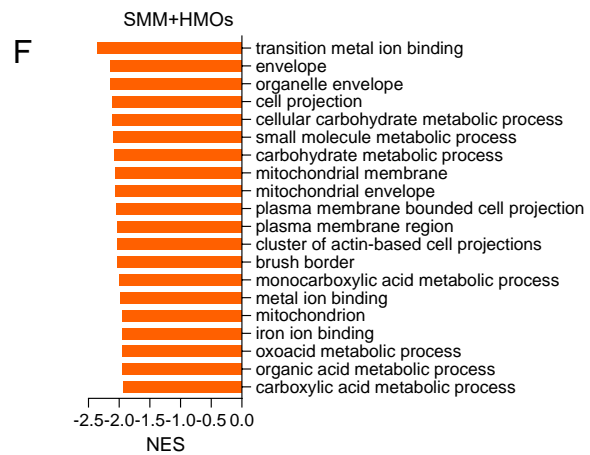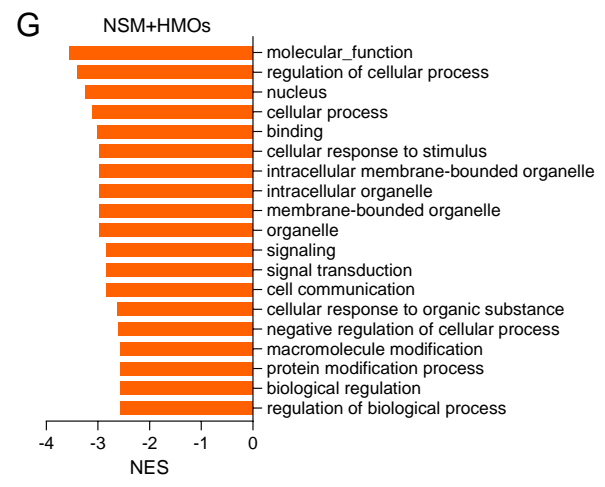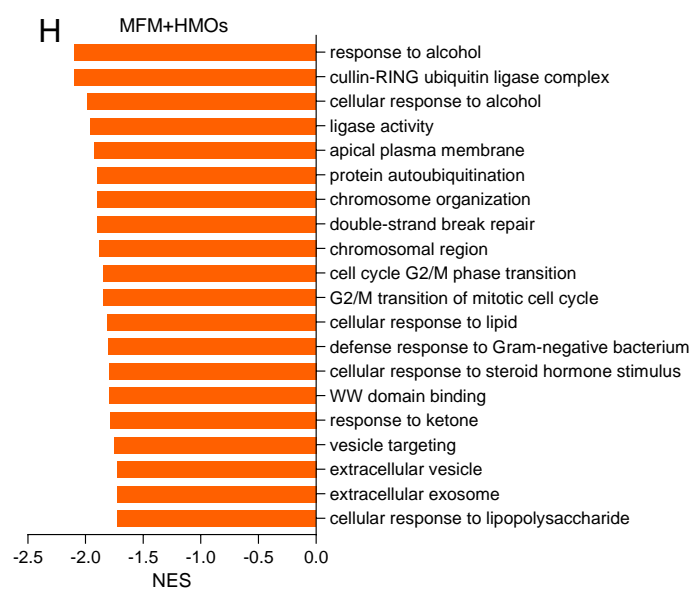

Supp Fig 7

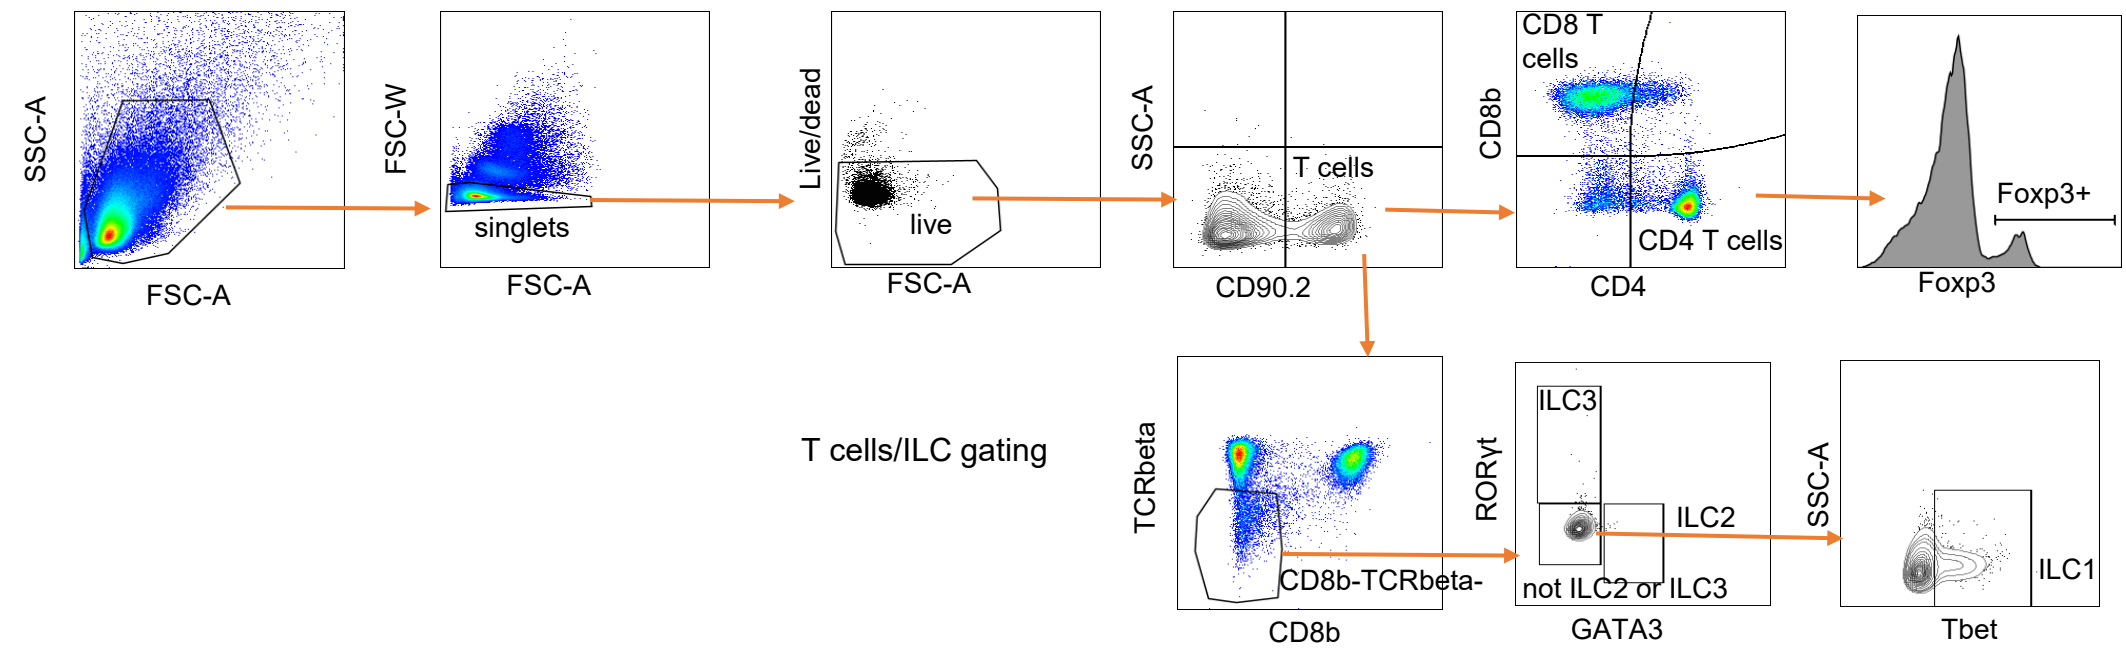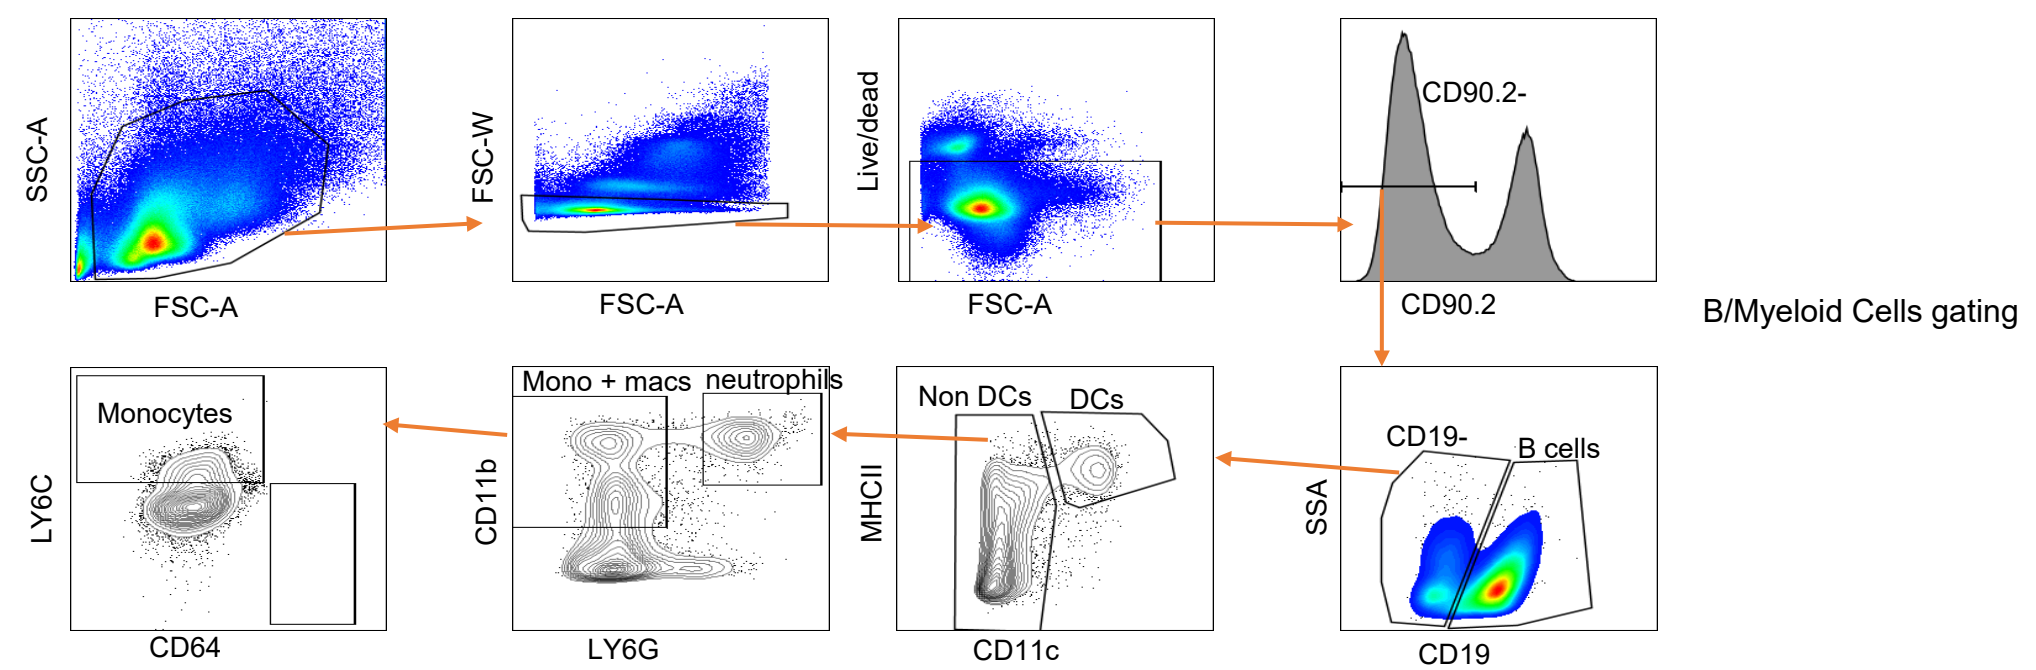

Supplement: msystems.00294-24-s0001.pdf [file msystems.00294-24-s0001.pdf]
